# Supplementary material for: Effect of conjugated (EK)10 peptide on structural and dynamic properties of ubiquitin protein: a molecular dynamics simulation study
Source: Royal Society of Chemistry journal article supplement (doi:10.1039/d0tb00664e), 2020-01-01
Supplement: d0tb00664e1.pdf [file d0tb00664e1.pdf]

## Effect of Conjugated (EK)<sub>10</sub> Peptide on Structural and Dynamic Properties of Ubiquitin Protein: a Molecular Dynamics Simulation Study

Qing Shao\*

Chemical and Materials Department, University of Kentucky, Kentucky USA 40506

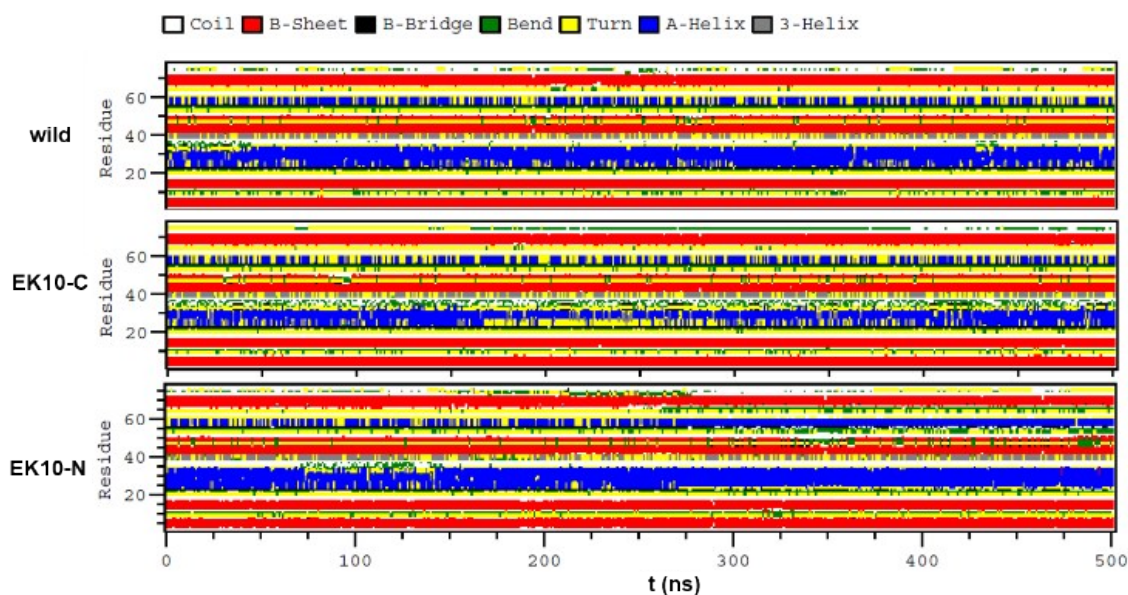

Figure S1. Secondary structure of individual residues vs. t. for the wild-type ubiquitin and the ubiquitin in the two conjugates
